# Supplementary material for: Asymmetric Synthesis of Contact Sex Pheromone of Tetropium fuscum and Its Enantiomer
Source: MDPI journal article supplement (doi:10.3390/molecules27206897), 2022-10-14
Supplement: s1 [file s1]

# SUPPORTING INFORMATION

## Asymmetric Synthesis of Contact Sex Pheromone of *Tetropium fuscum* and Its Enantiomer

Xueyang Wang <sup>1</sup>, Jianan Wang <sup>1</sup>, Fengbo Ma <sup>2</sup>, Qinghua Bian <sup>1</sup>, Min Wang <sup>1</sup>  
and Jiangchun Zhong <sup>1,\*</sup>

<sup>1</sup> Department of Applied Chemistry, China Agricultural University,  
2 West Yuanmingyuan Road, Beijing 100193, China

<sup>2</sup> College of Environmental Sciences, Sichuan Agricultural University,  
211 Huimin Road, Chengdu 611130, China

\* Correspondence: zhong@cau.edu.cn; Tel.: +86-010-6273-1356

### Table of Contents

|                                                                     |     |
|---------------------------------------------------------------------|-----|
| 1. <sup>1</sup> H, <sup>13</sup> C NMR Spectra of the Products..... | S2  |
| 2. HPLC Chromatography of the Compounds.....                        | S17 |

## 1. $^1\text{H}$ , $^{13}\text{C}$ NMR Spectra of the Products

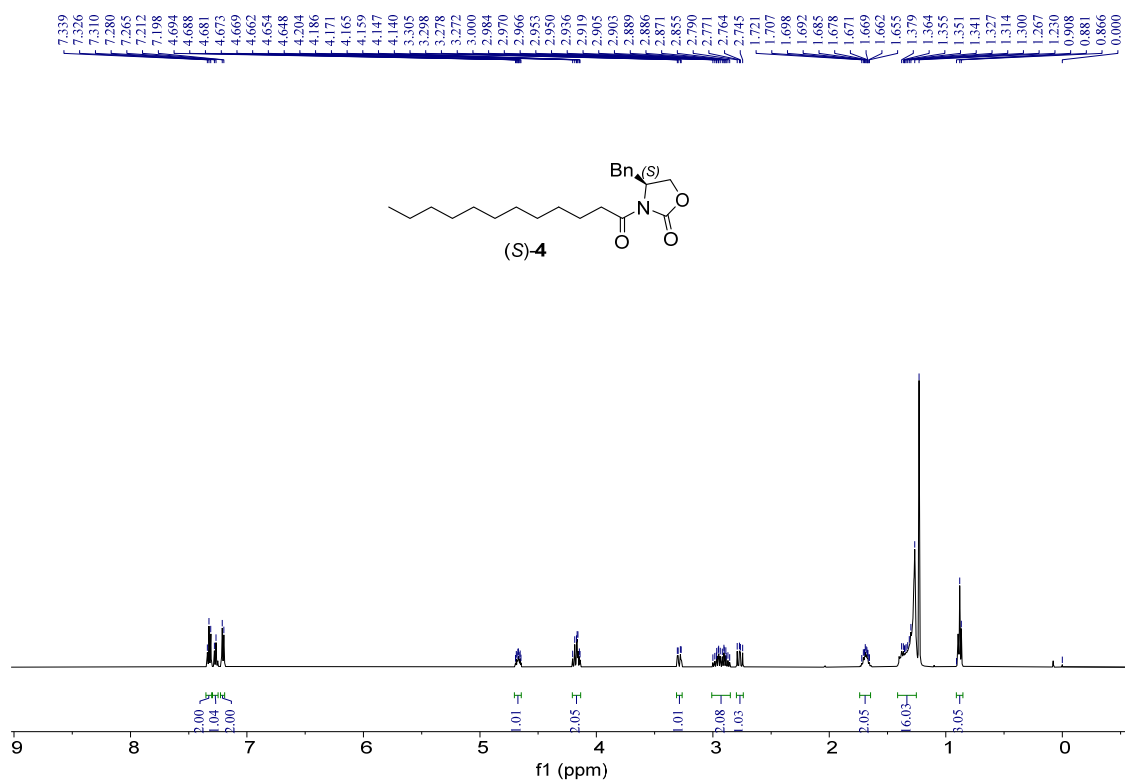

Figure S1.  $^1\text{H}$  NMR Spectrum of (S)-4-benzyl-3-dodecanoyloxazolidin-2-one ((S)-4) (500 MHz,  $\text{CDCl}_3$ )

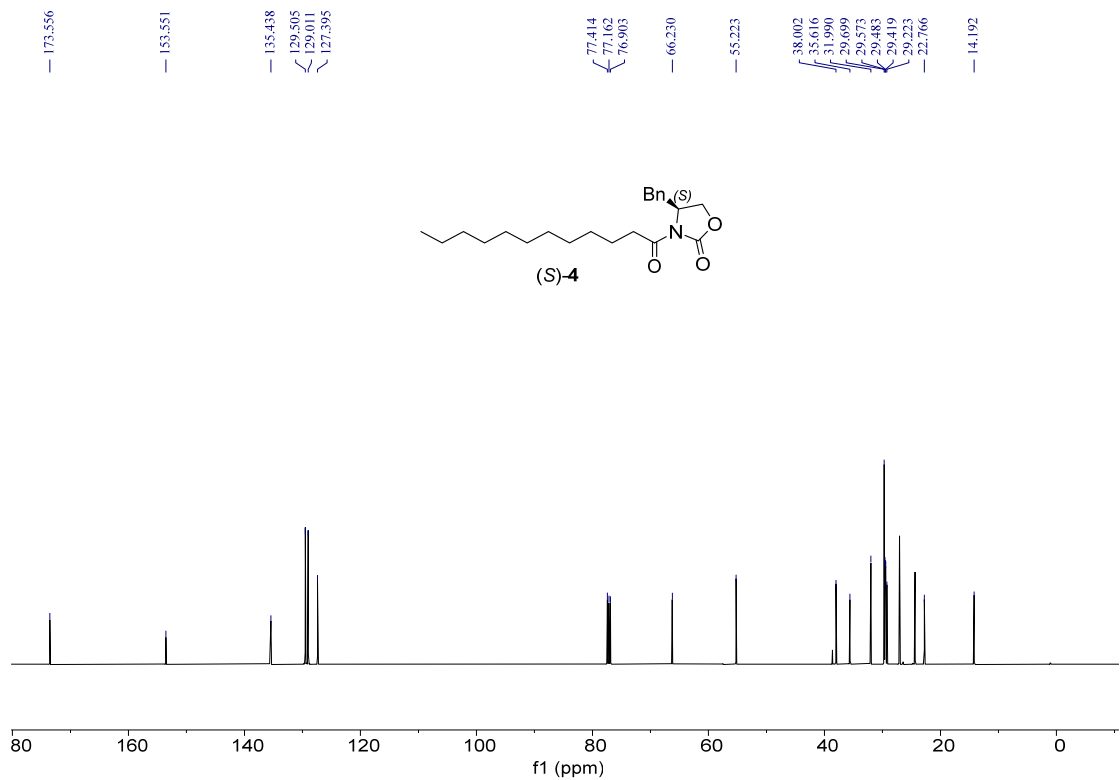

Figure S2.  $^{13}\text{C}$  NMR Spectrum of (S)-4-benzyl-3-dodecanoyloxazolidin-2-one ((S)-4) (126 MHz,  $\text{CDCl}_3$ )

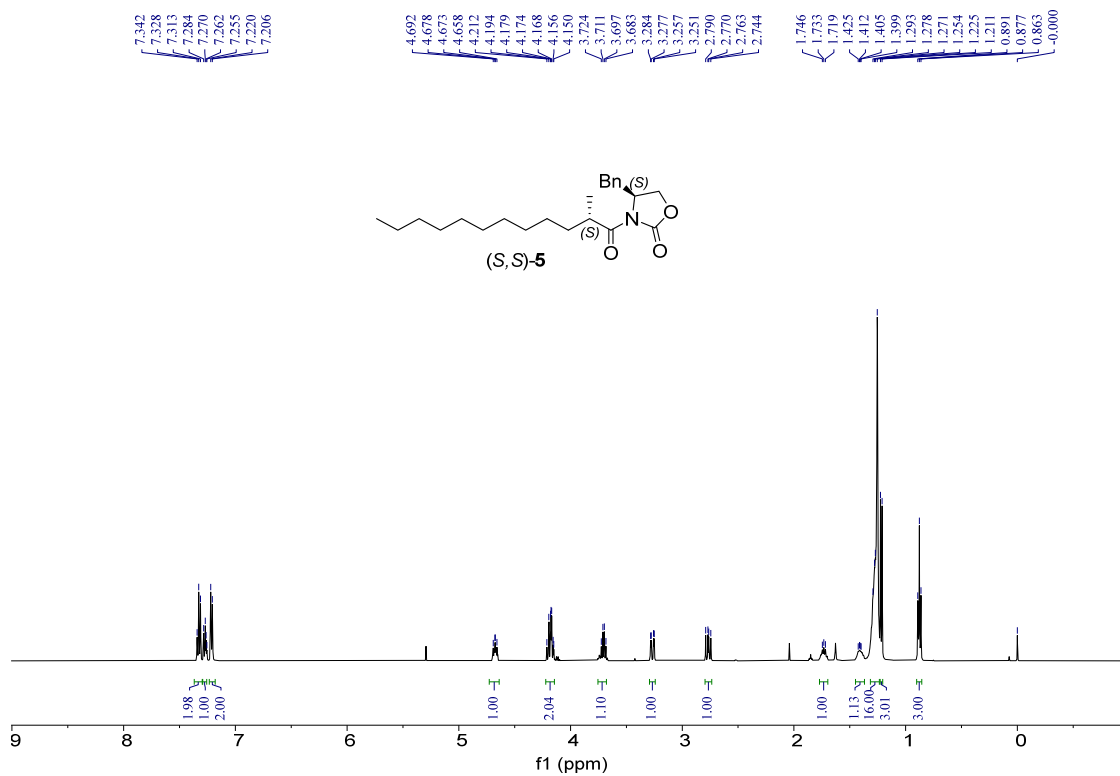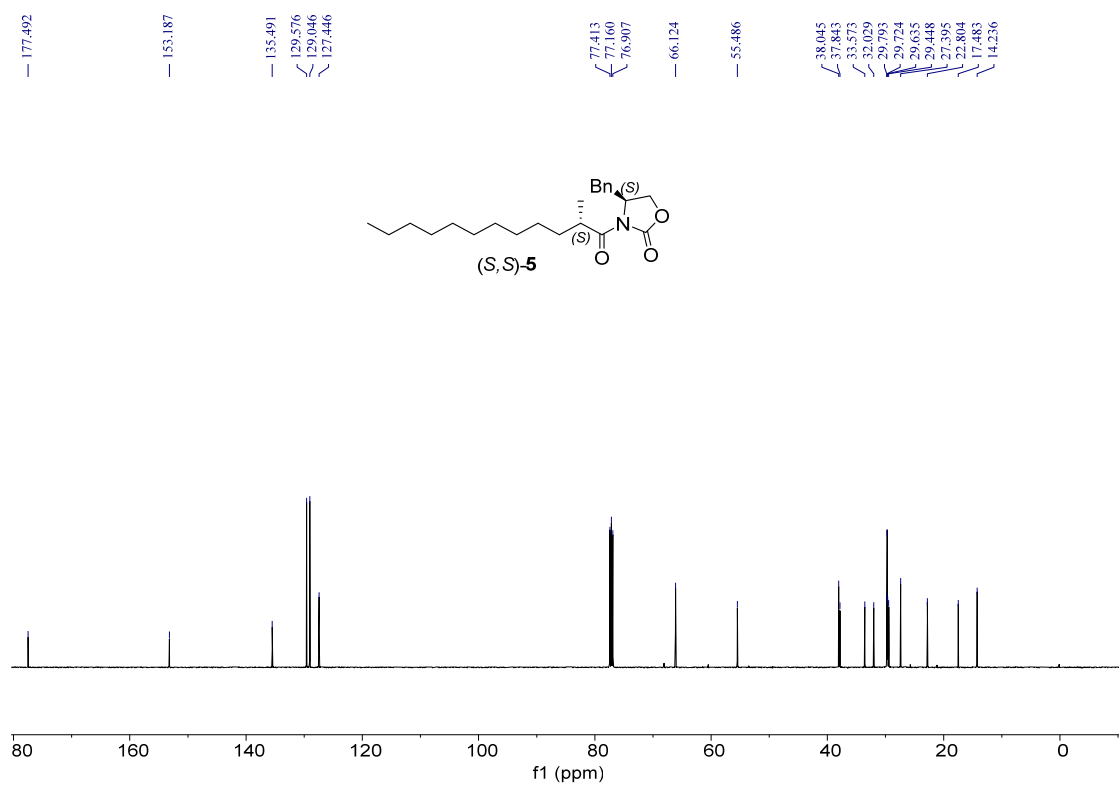

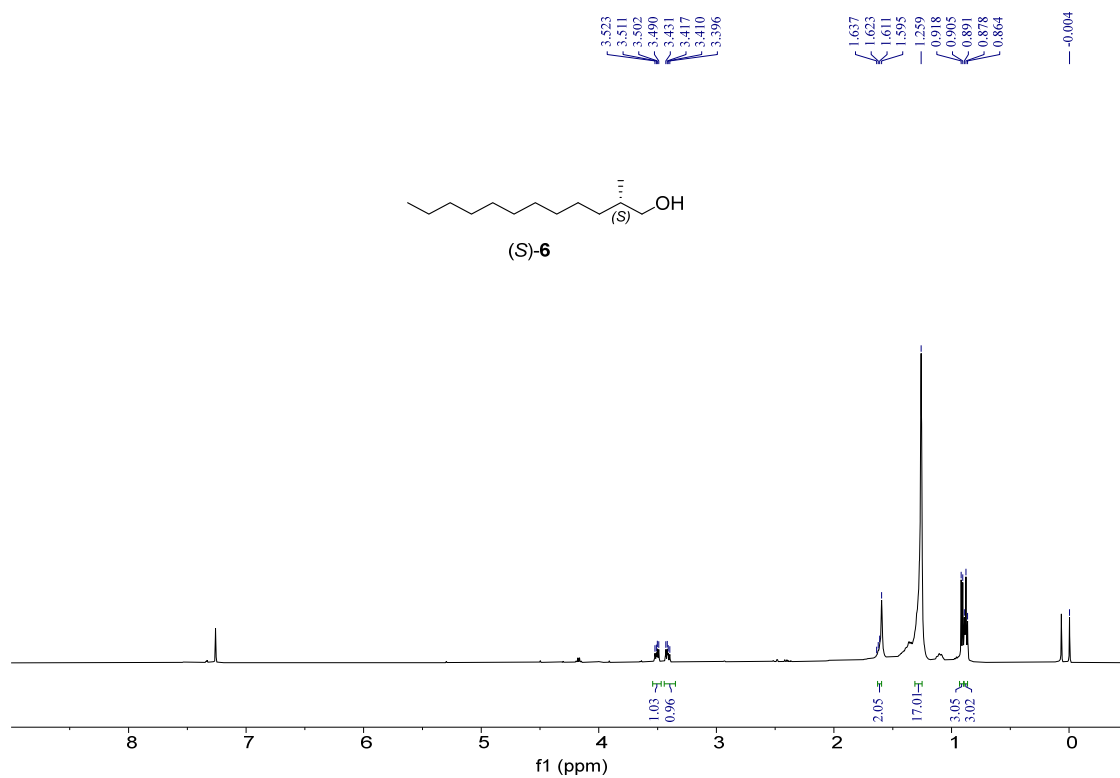

Figure S5. <sup>1</sup>H NMR Spectrum of (S)-2-methyldodecan-1-ol ((S)-6) (500 MHz, CDCl<sub>3</sub>)

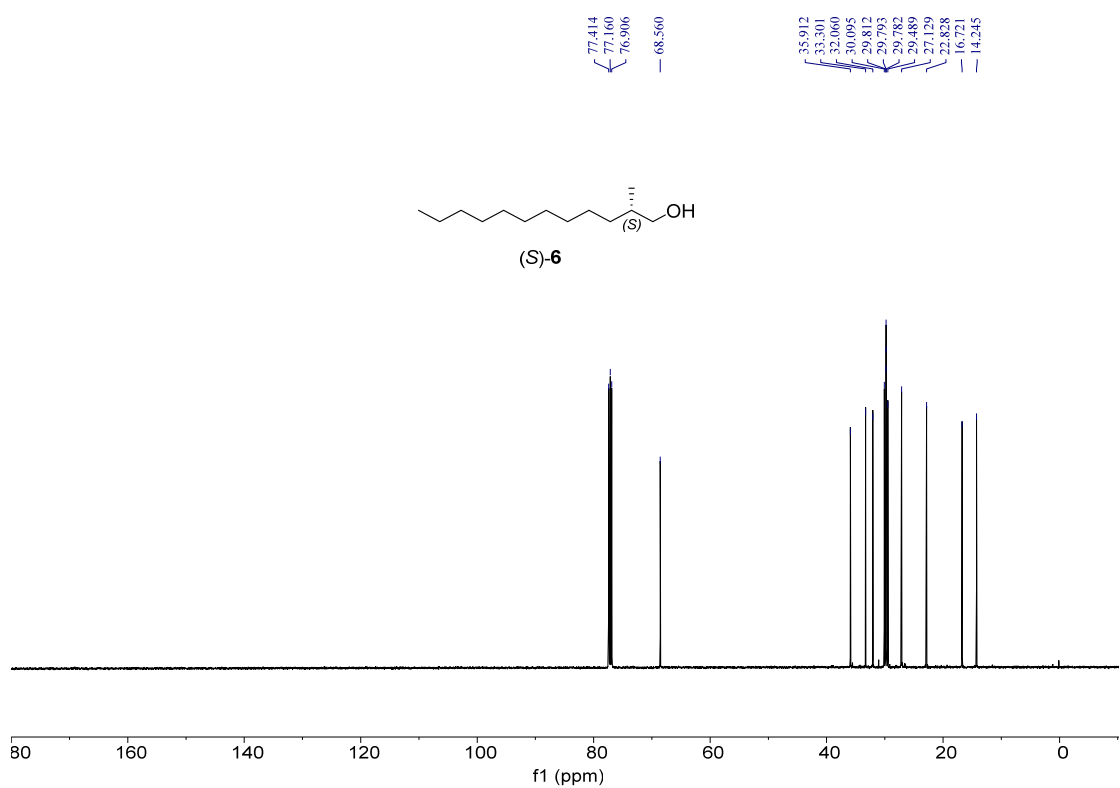

Figure S6. <sup>13</sup>C NMR Spectrum of (S)-2-methyldodecan-1-ol ((S)-6) (126 MHz, CDCl<sub>3</sub>)

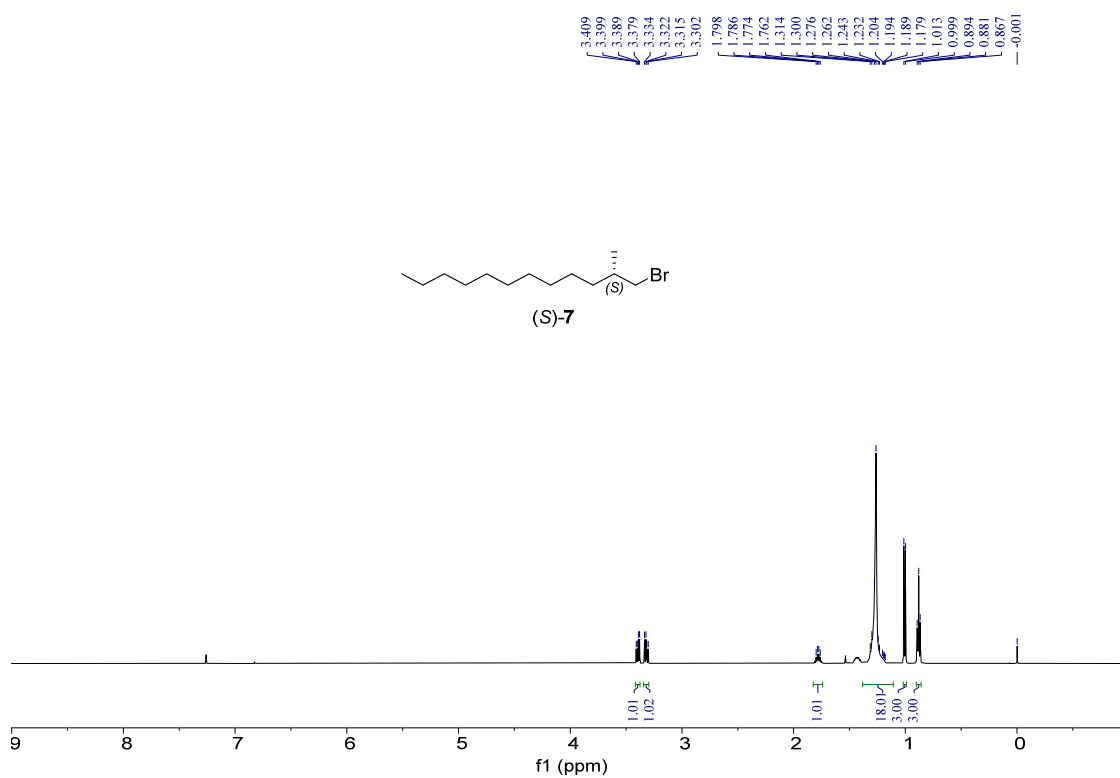

**Figure S7.** <sup>1</sup>H NMR Spectrum of (S)-1-bromo-2-methyldodecane ((S)-7) (500 MHz, CDCl<sub>3</sub>)

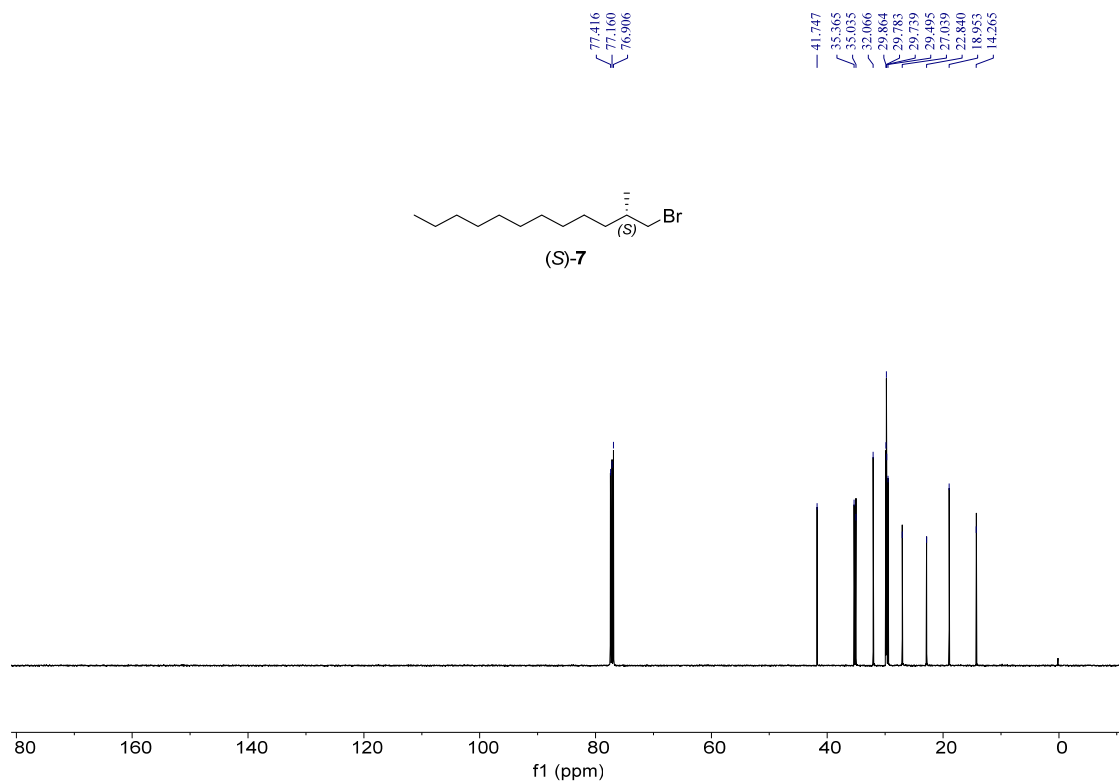

**Figure S8.** <sup>13</sup>C NMR Spectrum of (S)-1-bromo-2-methyldodecane ((S)-7) (126 MHz, CDCl<sub>3</sub>)

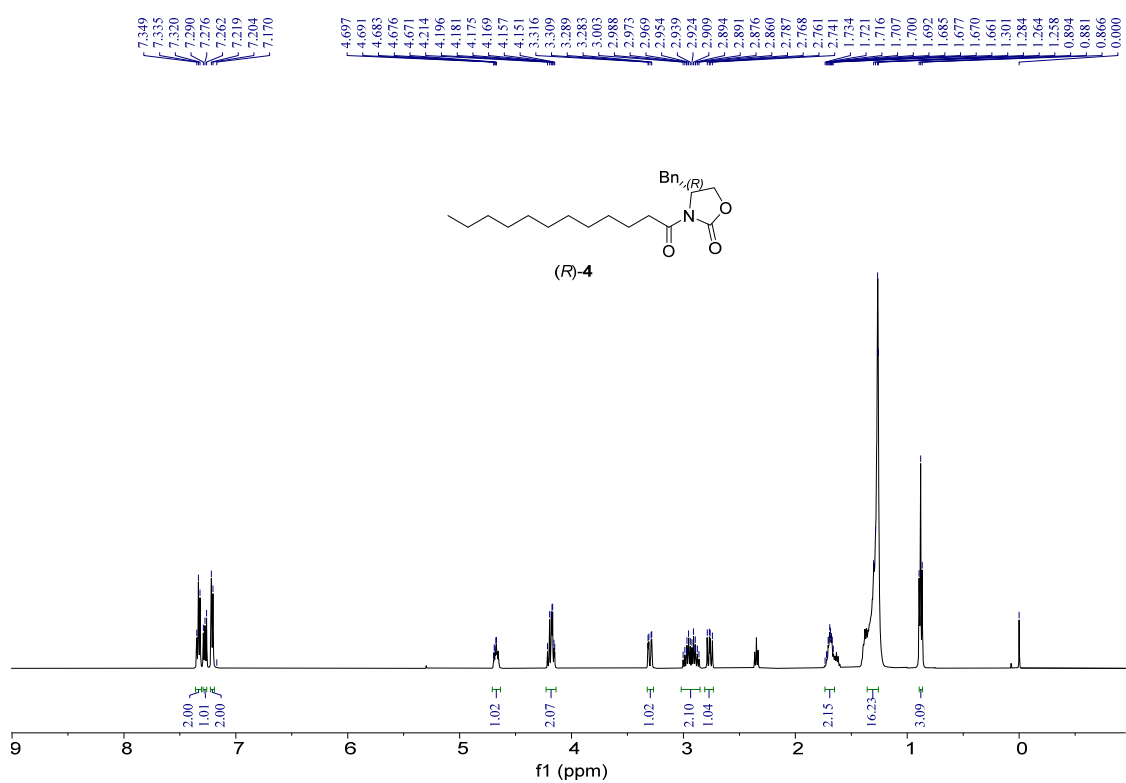

**Figure S9.** <sup>1</sup>H NMR Spectrum of (R)-4-benzyl-3-dodecanoyloxazolidin-2-one ((R)-4) (500 MHz, CDCl<sub>3</sub>)

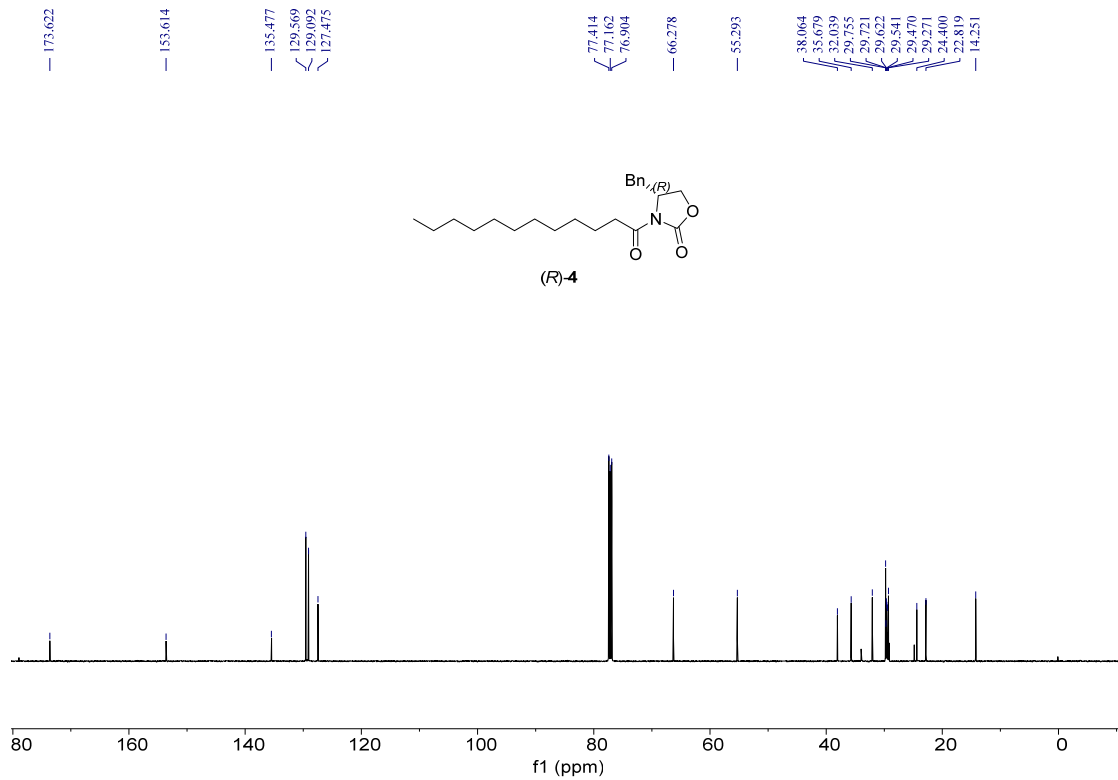

**Figure S10.** <sup>13</sup>C NMR Spectrum of (R)-4-benzyl-3-dodecanoyloxazolidin-2-one ((R)-4) (126 MHz, CDCl<sub>3</sub>)

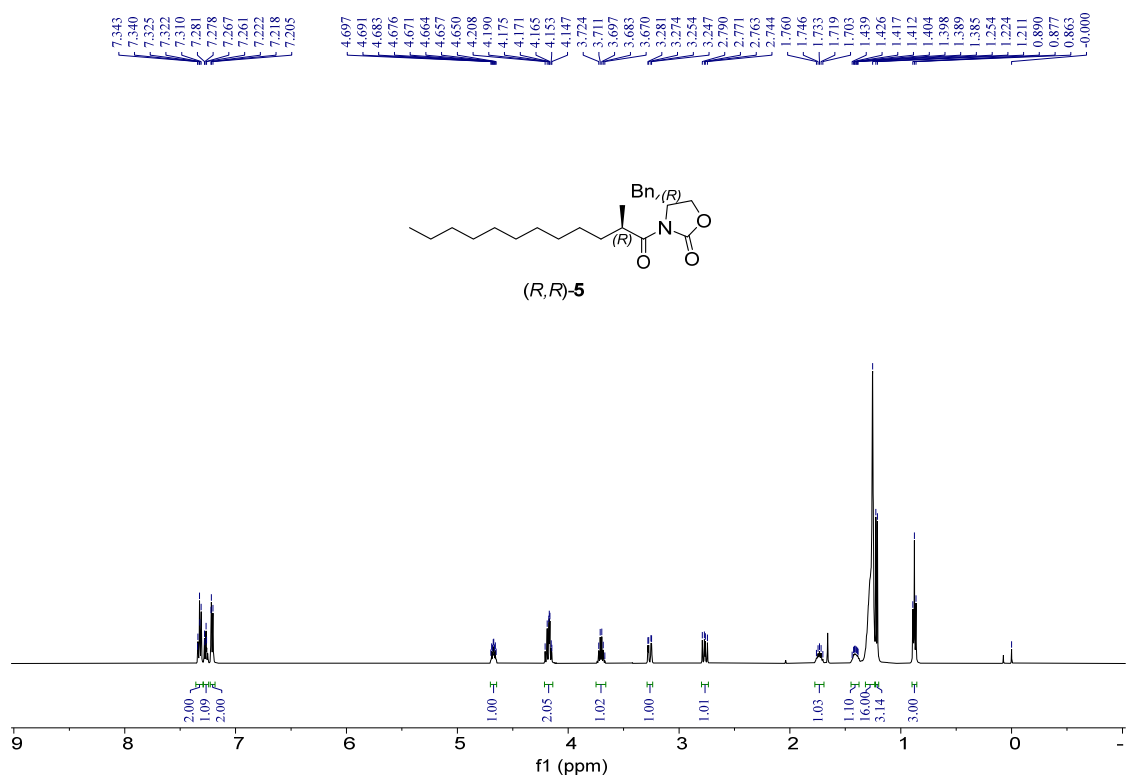

**Figure S11.** <sup>1</sup>H NMR Spectrum of (R)-4-benzyl-3-((R)-2-methyldodecanoyl)oxazolidin-2-one((R,R)-5) (500 MHz, CDCl<sub>3</sub>)

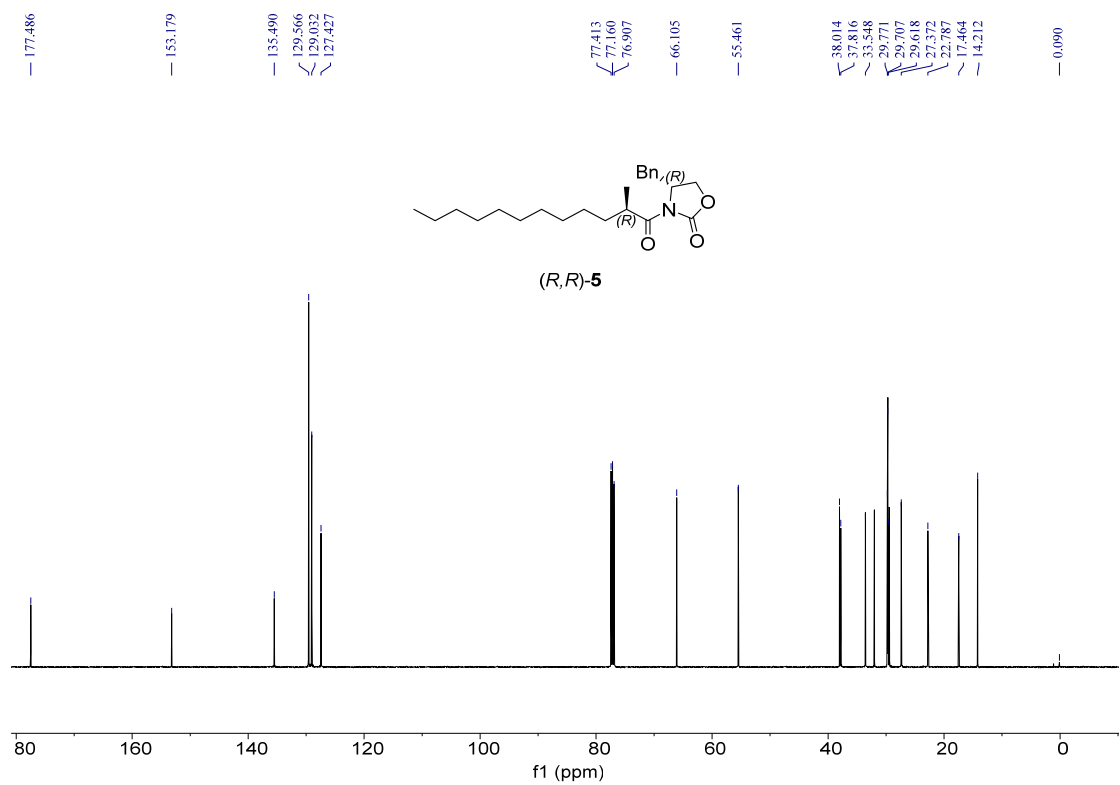

**Figure S12.** <sup>13</sup>C NMR Spectrum of (R)-4-benzyl-3-((R)-2-methyldodecanoyl)oxazolidin-2-one((R,R)-5) (126 MHz, CDCl<sub>3</sub>)

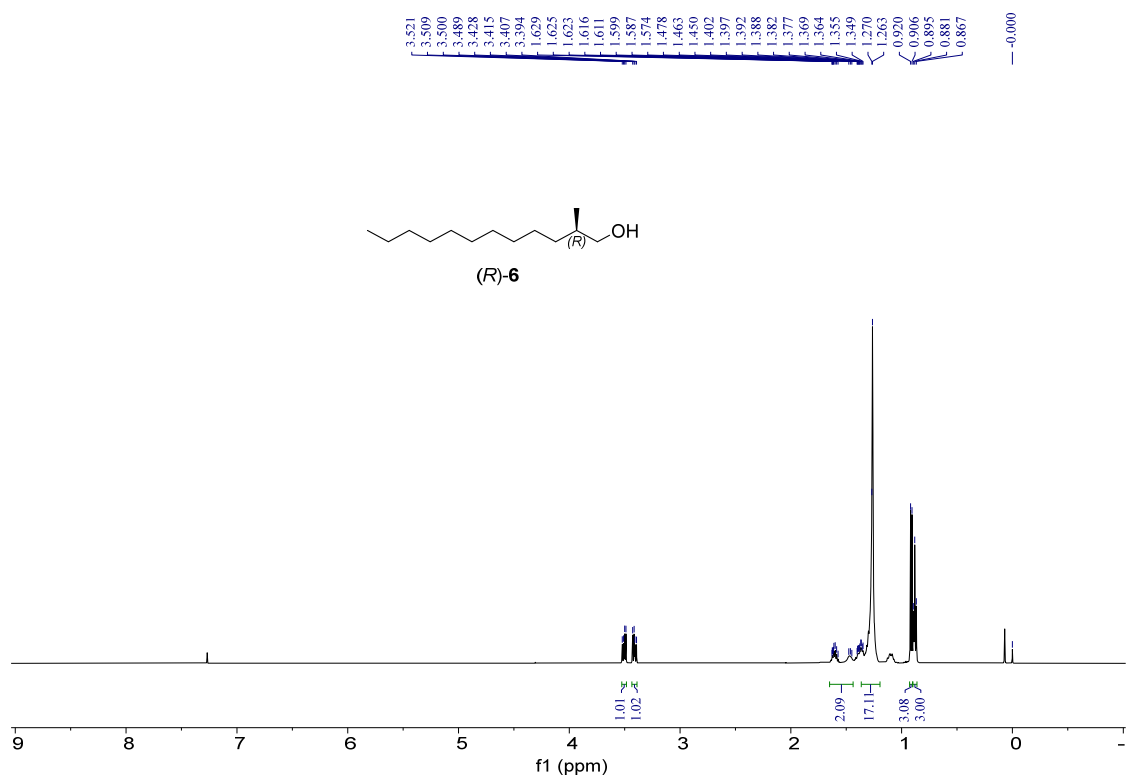

**Figure S13.** <sup>1</sup>H NMR Spectrum of (R)-2-methyldodecan-1-ol ((R)-6) (500 MHz, CDCl<sub>3</sub>)

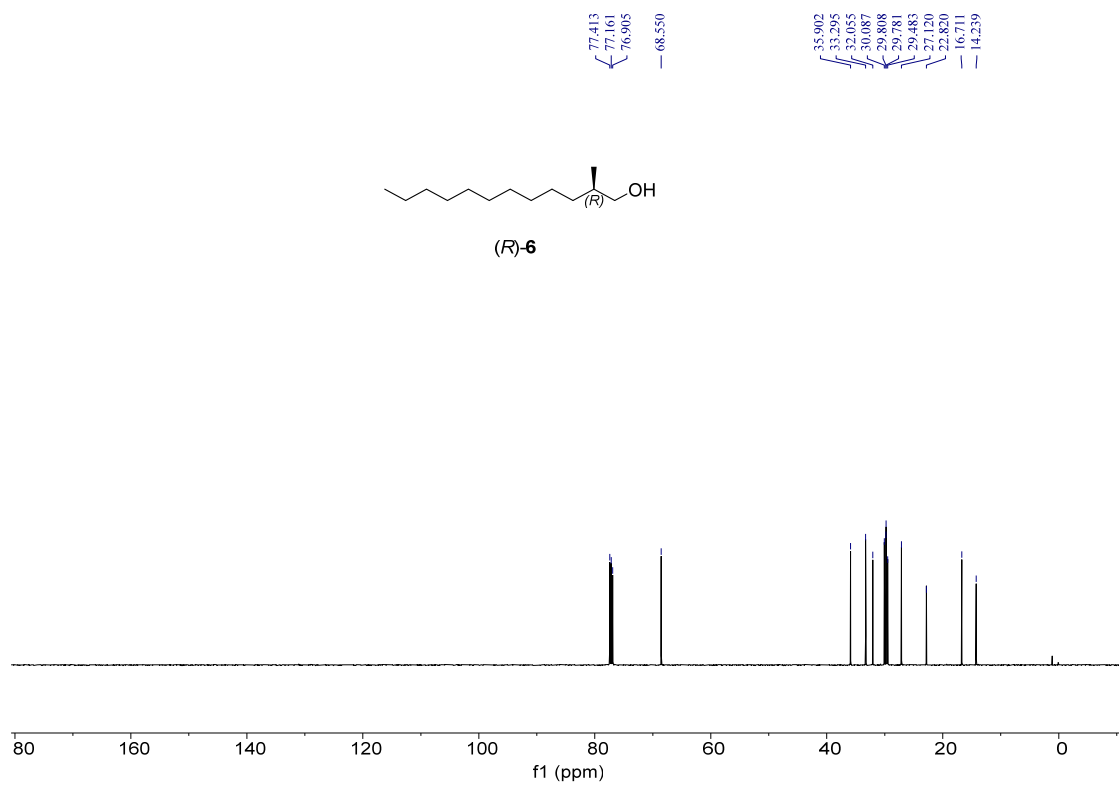

**Figure S14.** <sup>13</sup>C NMR Spectrum of (R)-2-methyldodecan-1-ol ((R)-6) (126 MHz, CDCl<sub>3</sub>)



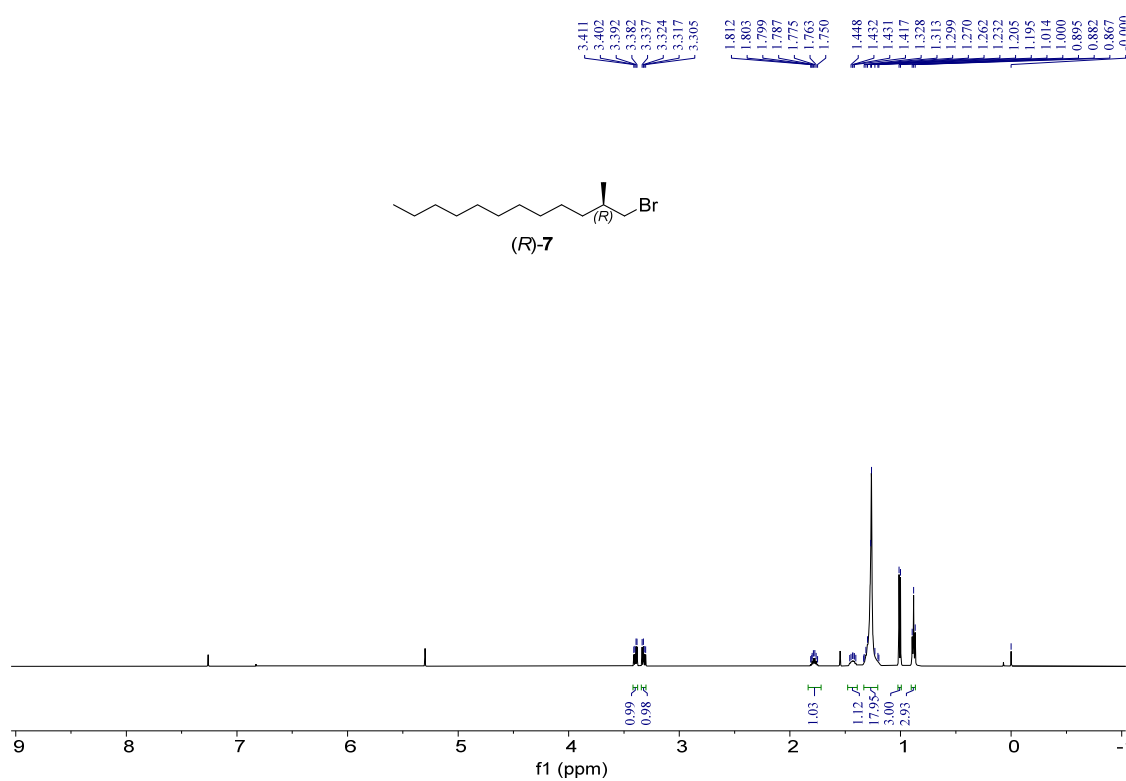

**Figure S15.** <sup>1</sup>H NMR Spectrum of (R)-1-bromo-2-methyldodecane ((R)-7) (500 MHz, CDCl<sub>3</sub>)

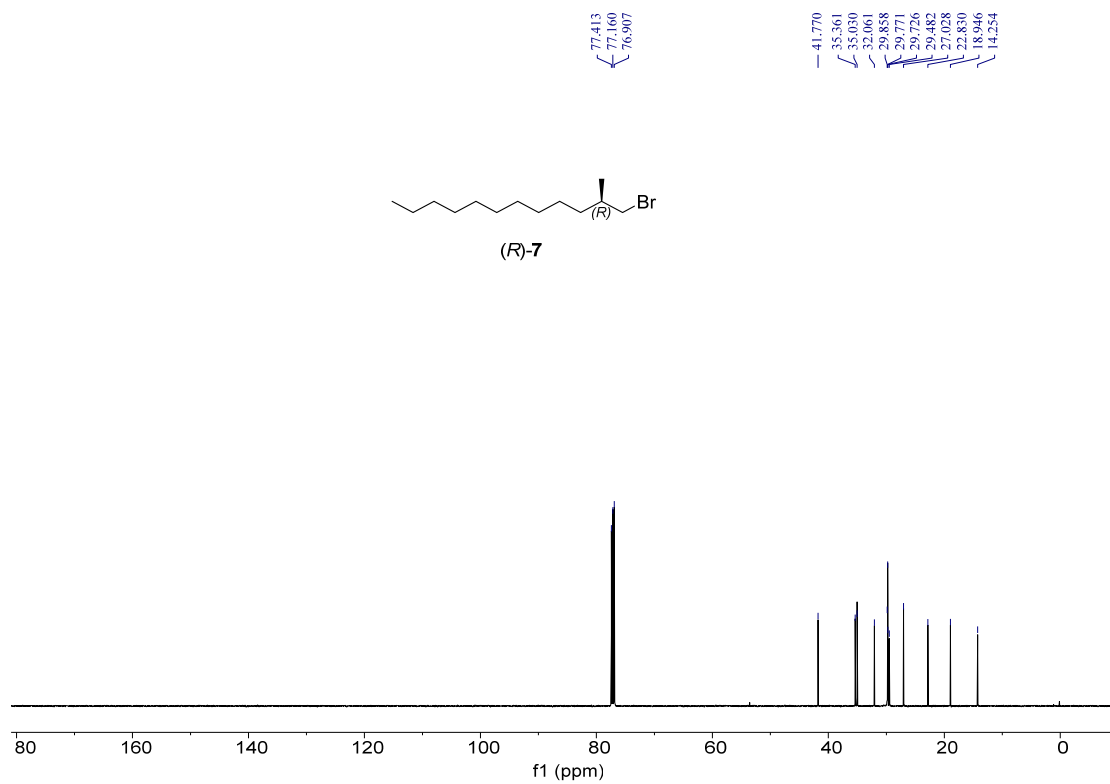

**Figure S16.** <sup>13</sup>C NMR Spectrum of (R)-1-bromo-2-methyldodecane ((R)-7) (126 MHz, CDCl<sub>3</sub>)

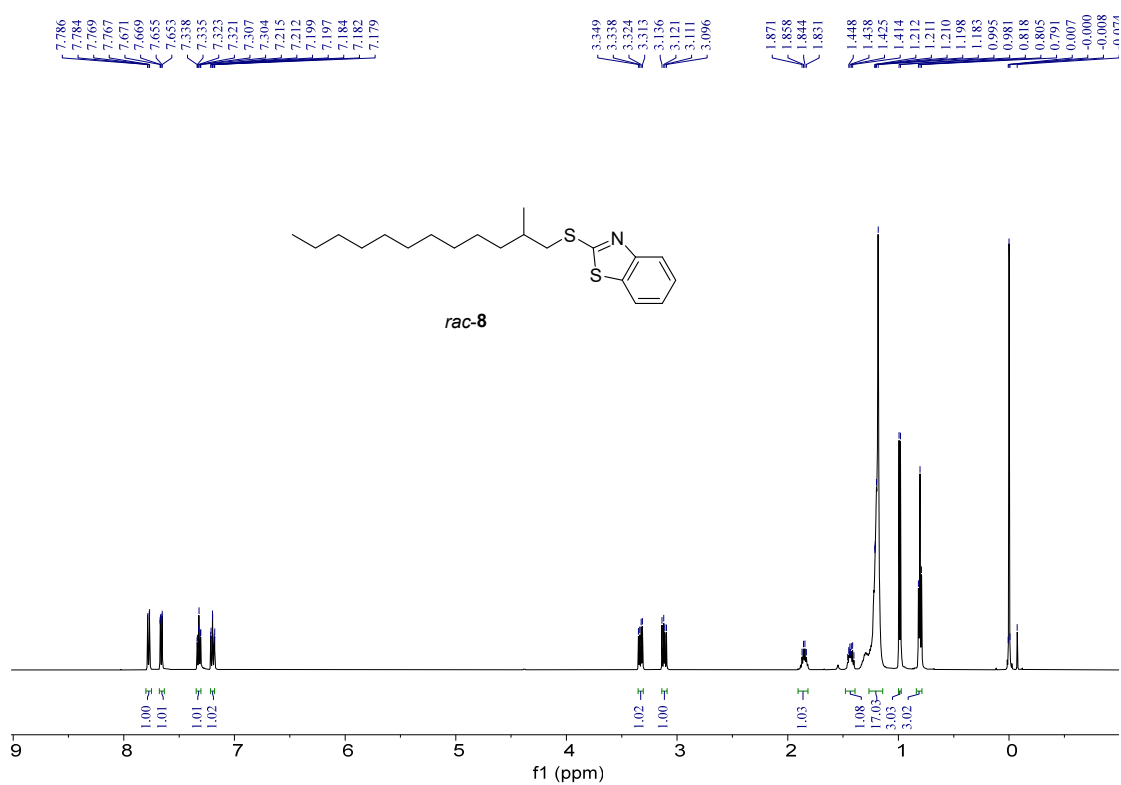

**Figure S17.** <sup>1</sup>H NMR Spectrum of 2-((2-methyldodecyl)thio)benzo[d]thiazole (*rac-8*) (500 MHz, CDCl<sub>3</sub>)

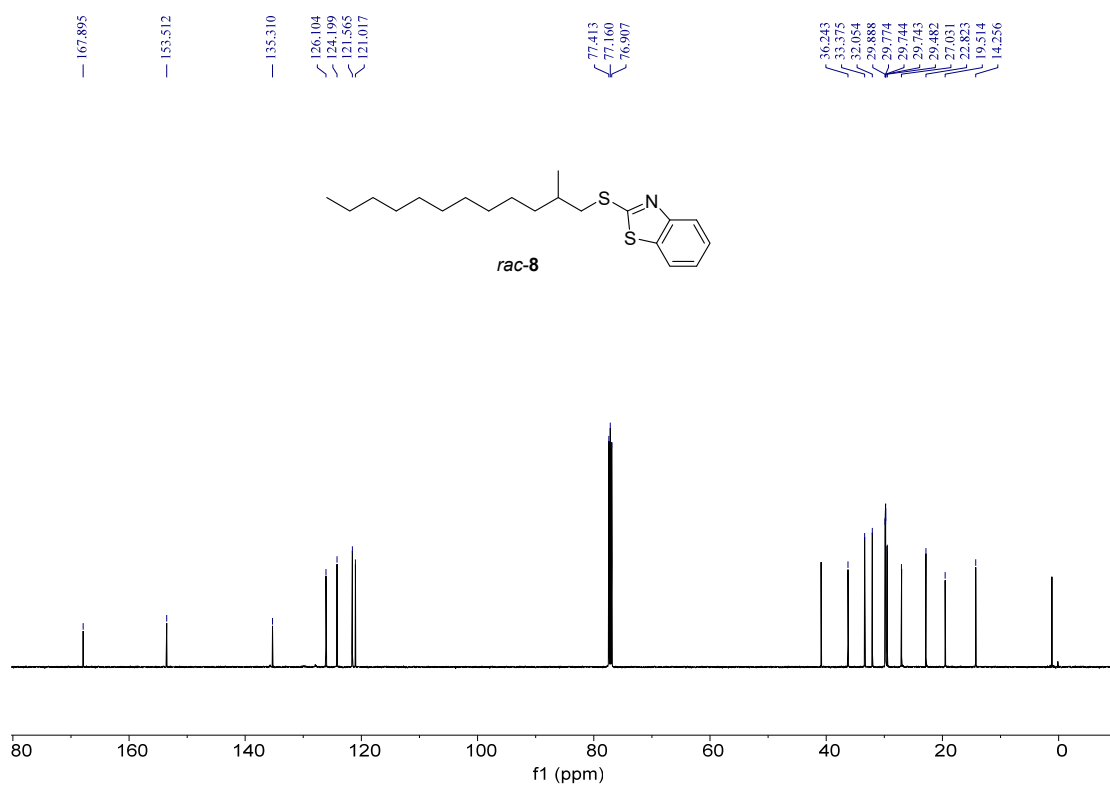

**Figure S18.** <sup>13</sup>C NMR Spectrum of 2-((2-methyldodecyl)thio)benzo[d]thiazole (*rac-8*) (126 MHz, CDCl<sub>3</sub>)

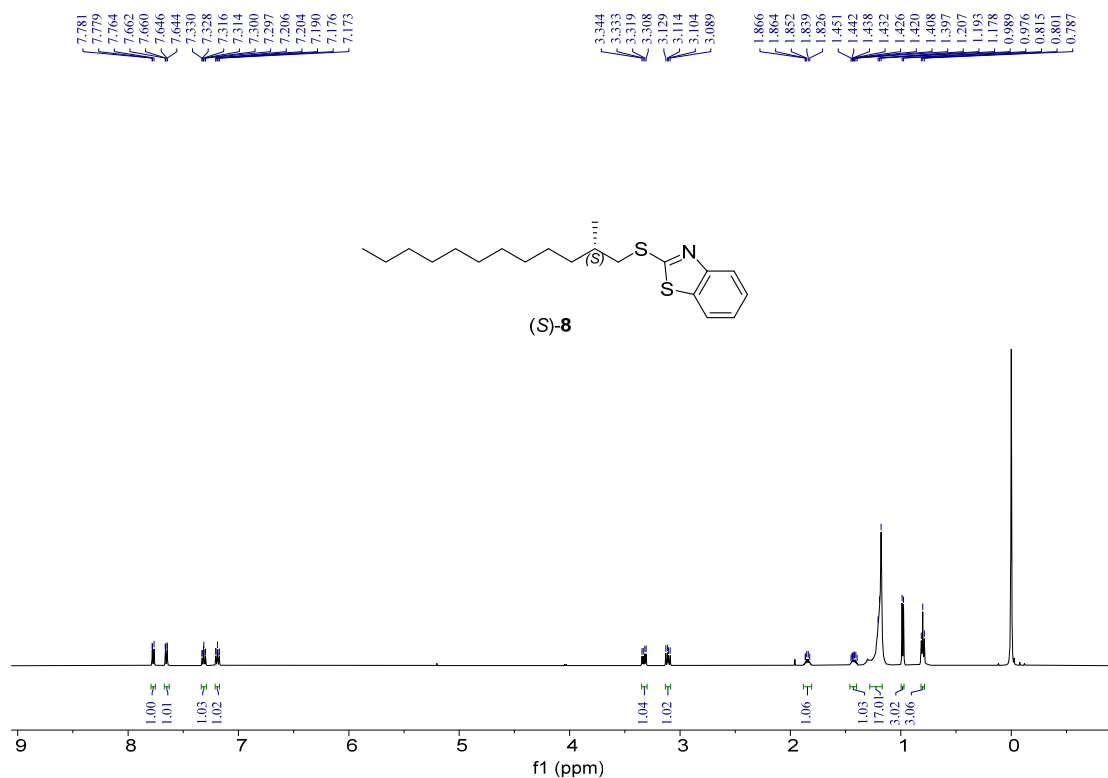

**Figure S19.** <sup>1</sup>H NMR Spectrum of (S)-2-((2-methyldodecyl)thio)benzo[d]thiazole ((S)-8) (500 MHz, CDCl<sub>3</sub>)

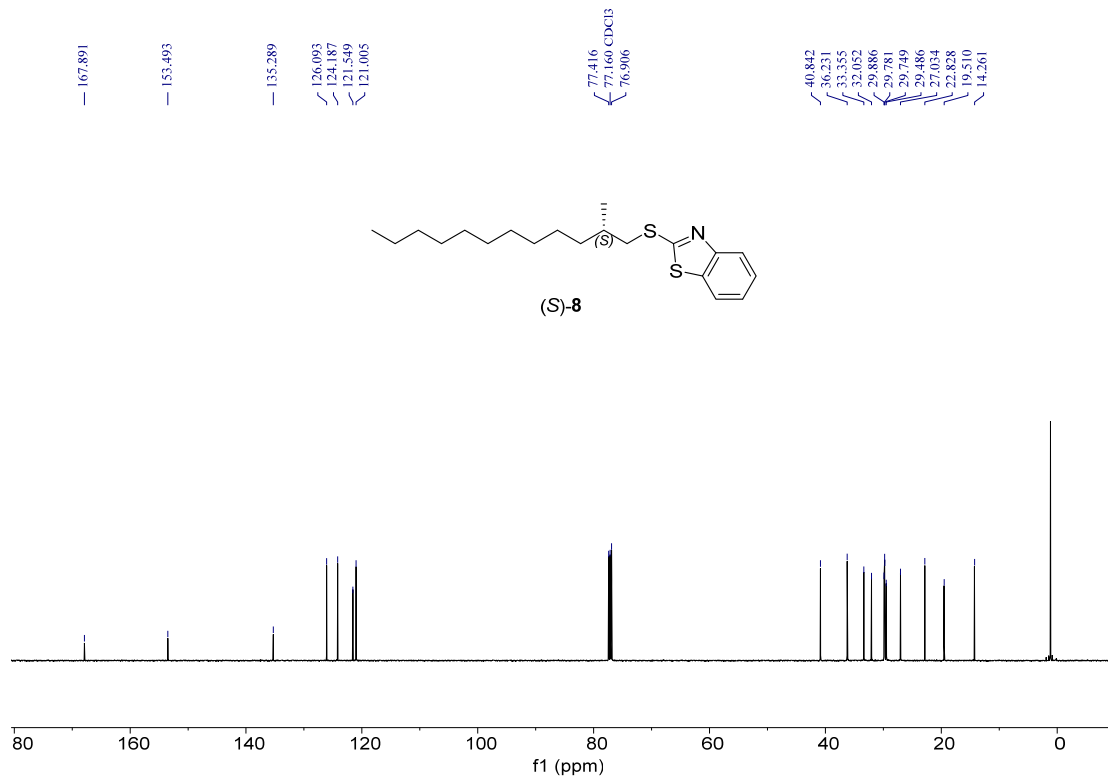

**Figure S20.** <sup>13</sup>C NMR Spectrum of (S)-2-((2-methyldodecyl)thio)benzo[d]thiazole ((S)-8) (126 MHz, CDCl<sub>3</sub>)

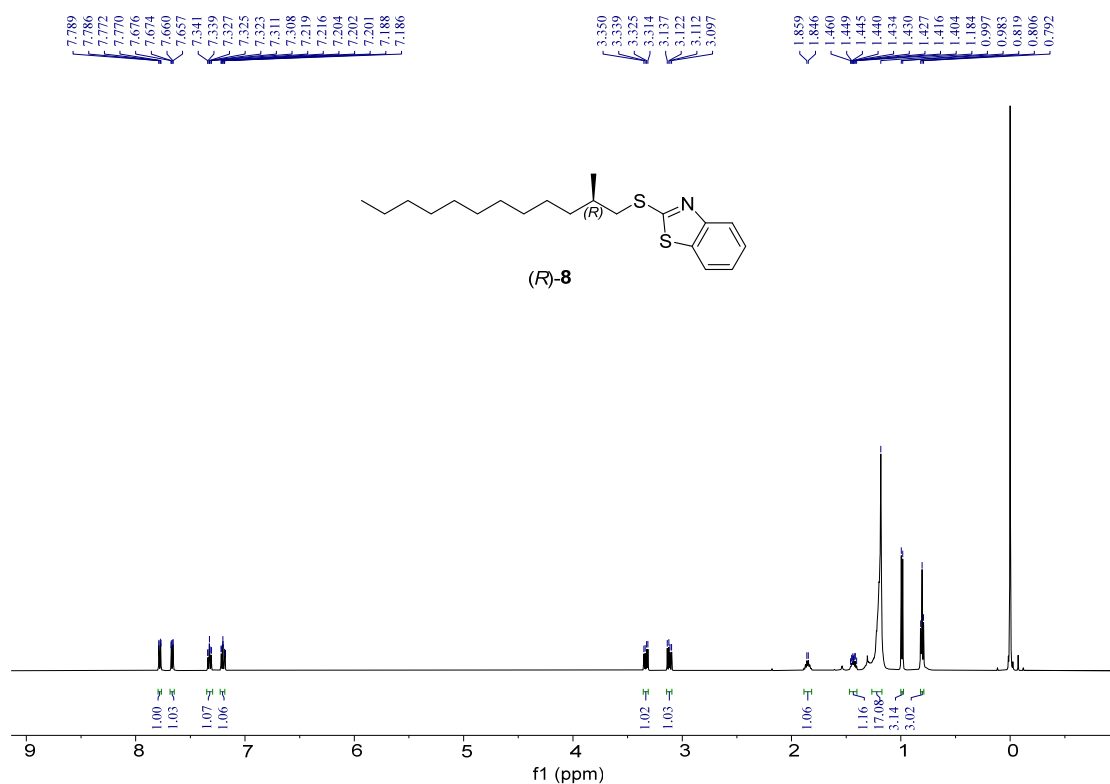

**Figure S21.** <sup>1</sup>H NMR Spectrum of (R)-2-((2-methyldodecyl)thio)benzo[d]thiazole ((R)-8) (500 MHz, CDCl<sub>3</sub>)

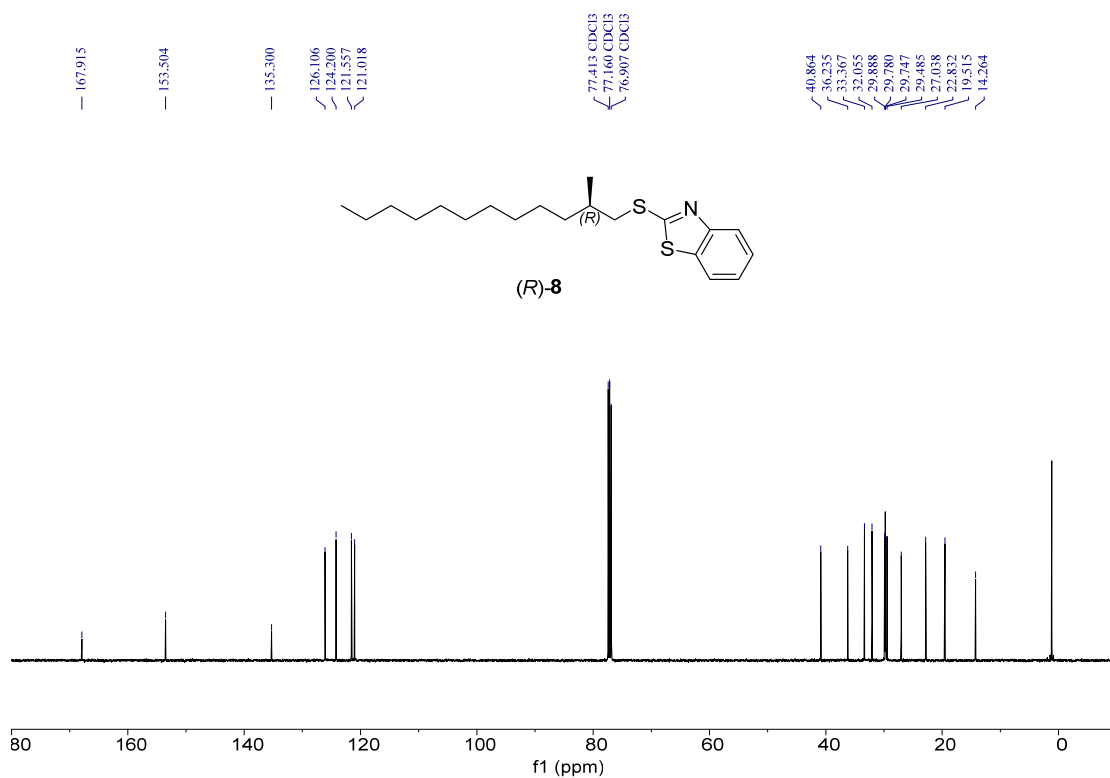

**Figure S22.** <sup>13</sup>C NMR Spectrum of (R)-2-((2-methyldodecyl)thio)benzo[d]thiazole ((R)-8) (126 MHz, CDCl<sub>3</sub>)

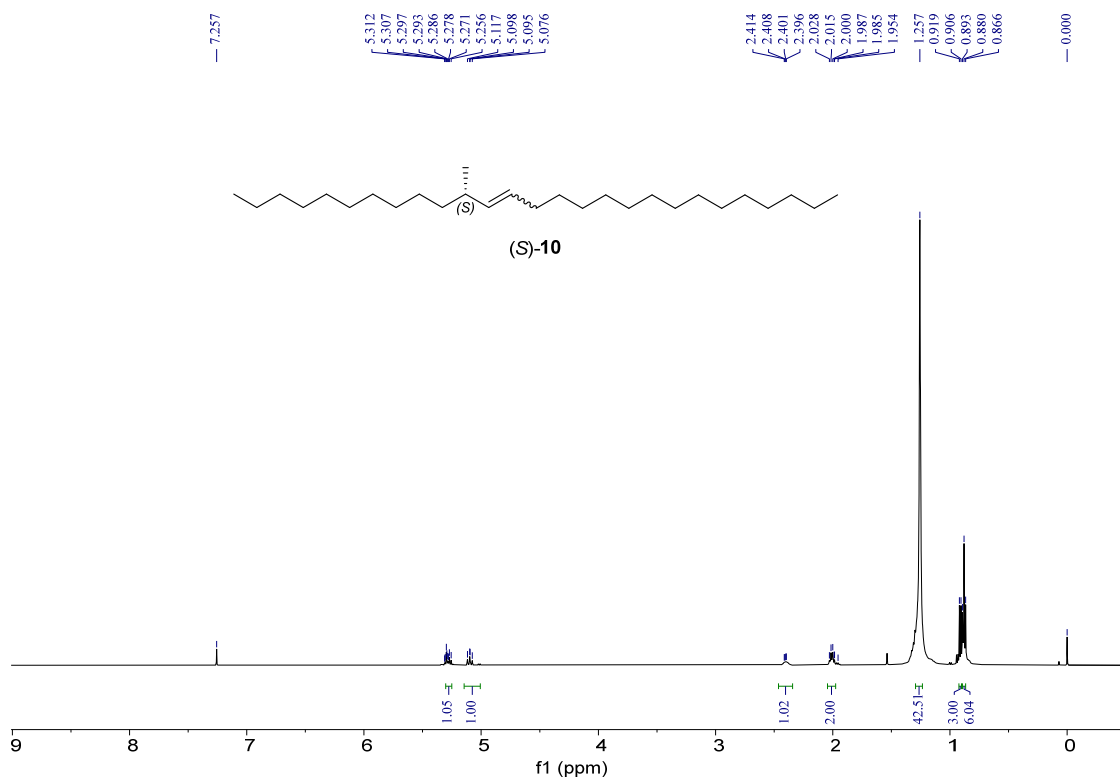

Figure S23.  $^1\text{H}$  NMR Spectrum of (S)-11-methylheptacos-9-ene ((S)-10) (500 MHz,  $\text{CDCl}_3$ )

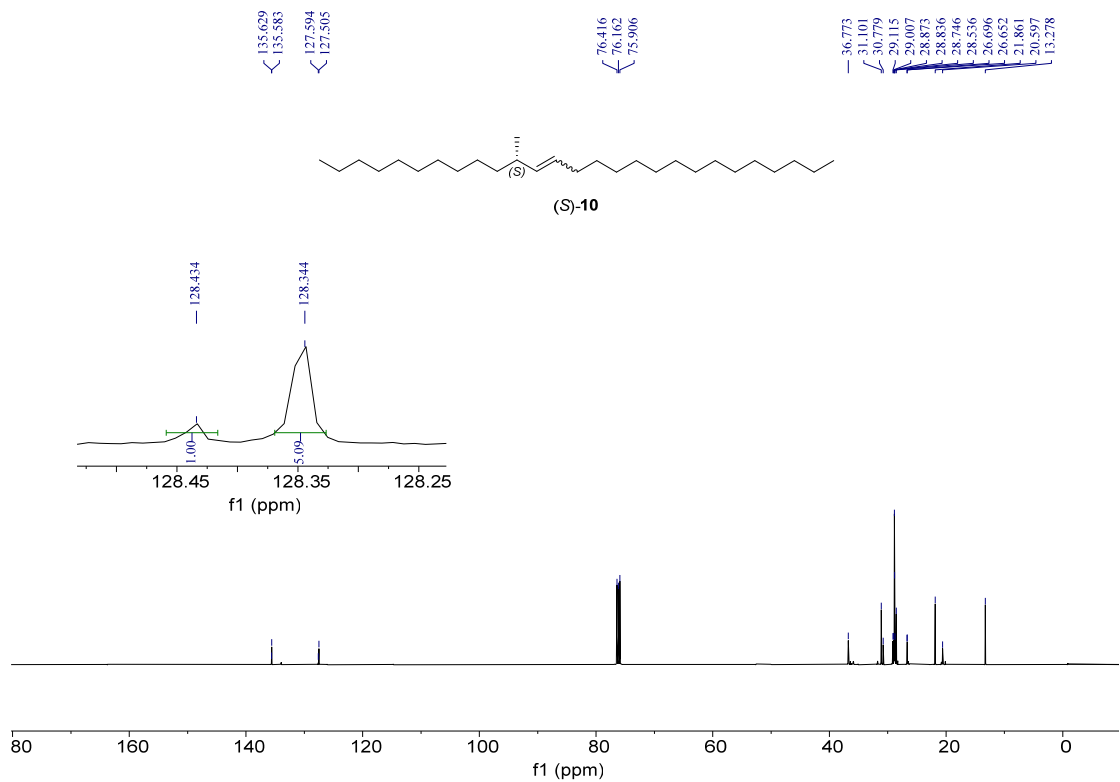

Figure S24.  $^{13}\text{C}$  NMR Spectrum of (S)-11-methylheptacos-9-ene ((S)-10) (126 MHz,  $\text{CDCl}_3$ )

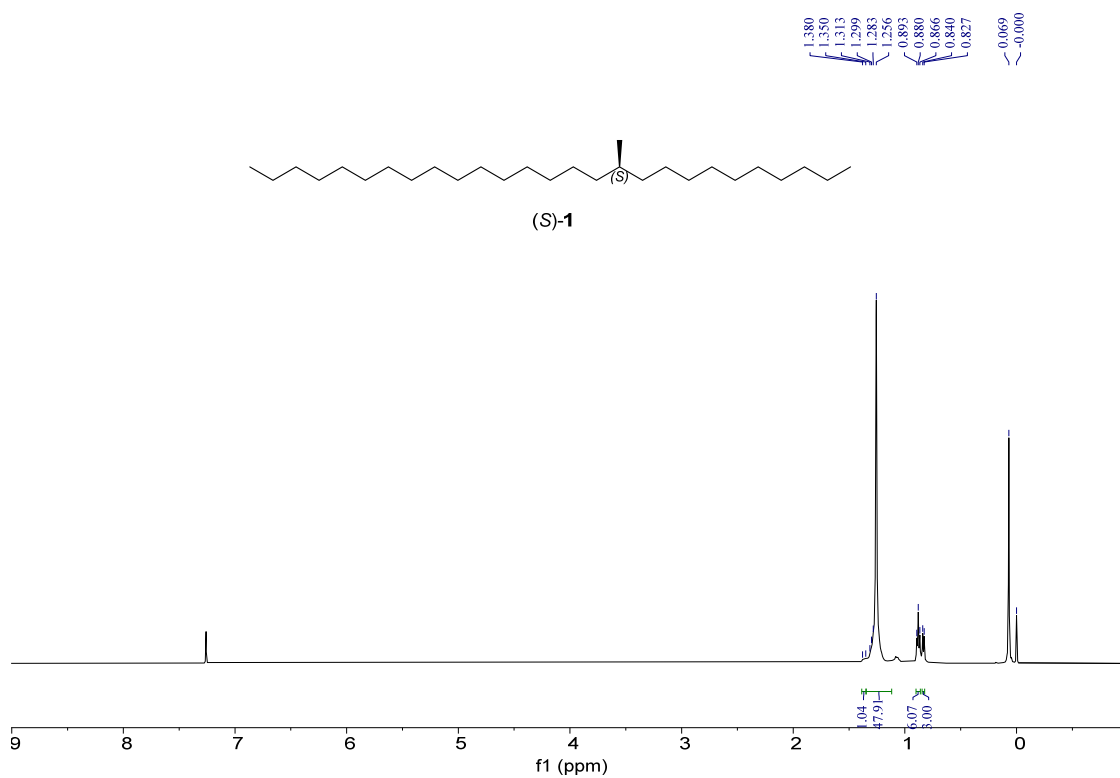

**Figure S25.** <sup>1</sup>H NMR Spectrum of (S)-11-methylheptacosane ((S)-1) (500 MHz, CDCl<sub>3</sub>)

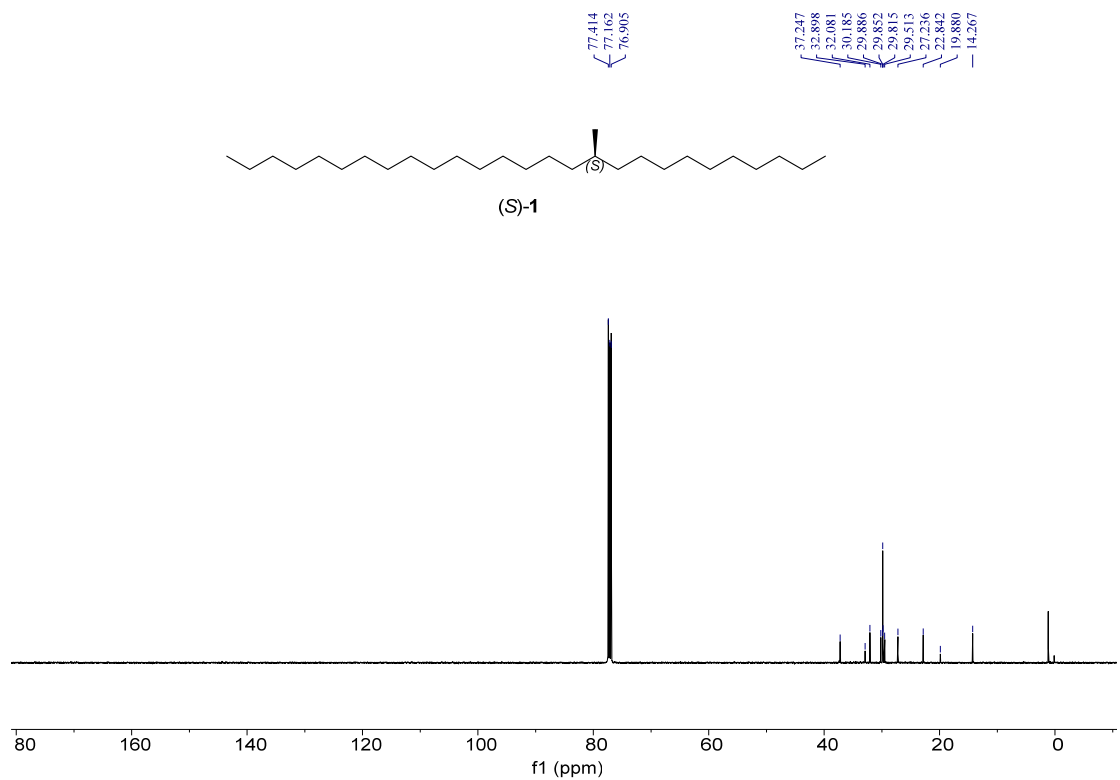

**Figure S26.** <sup>13</sup>C NMR Spectrum of (S)-11-methylheptacosane ((S)-1) (126 MHz, CDCl<sub>3</sub>)

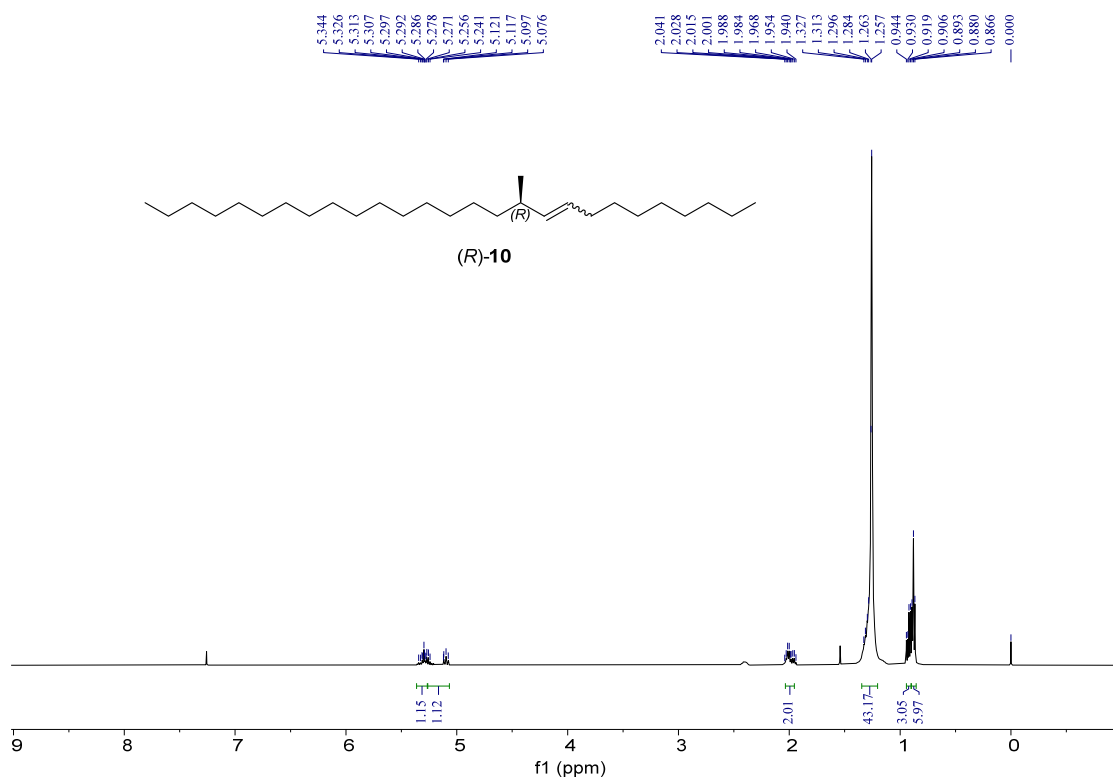

**Figure S27.** <sup>1</sup>H NMR Spectrum of (R)-11-methylheptacos-9-ene ((R)-10) (500 MHz, CDCl<sub>3</sub>)

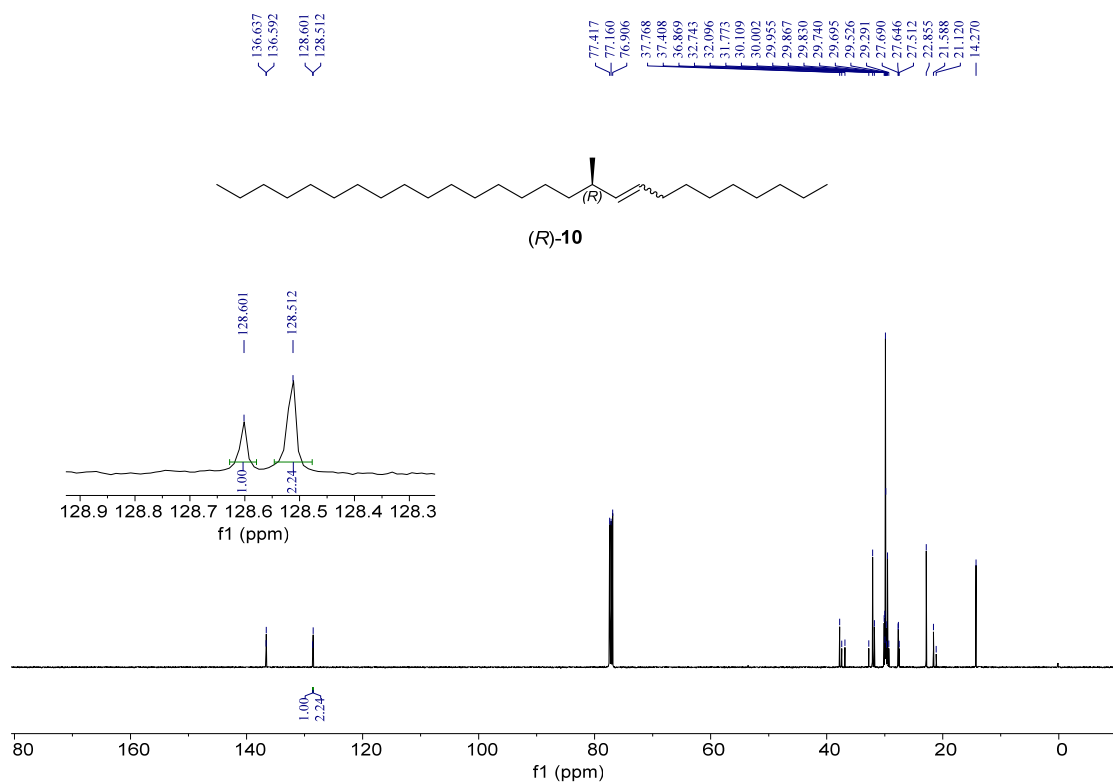

**Figure S28.** <sup>13</sup>C NMR Spectrum of (R)-11-methylheptacos-9-ene ((R)-10) (126 MHz, CDCl<sub>3</sub>)

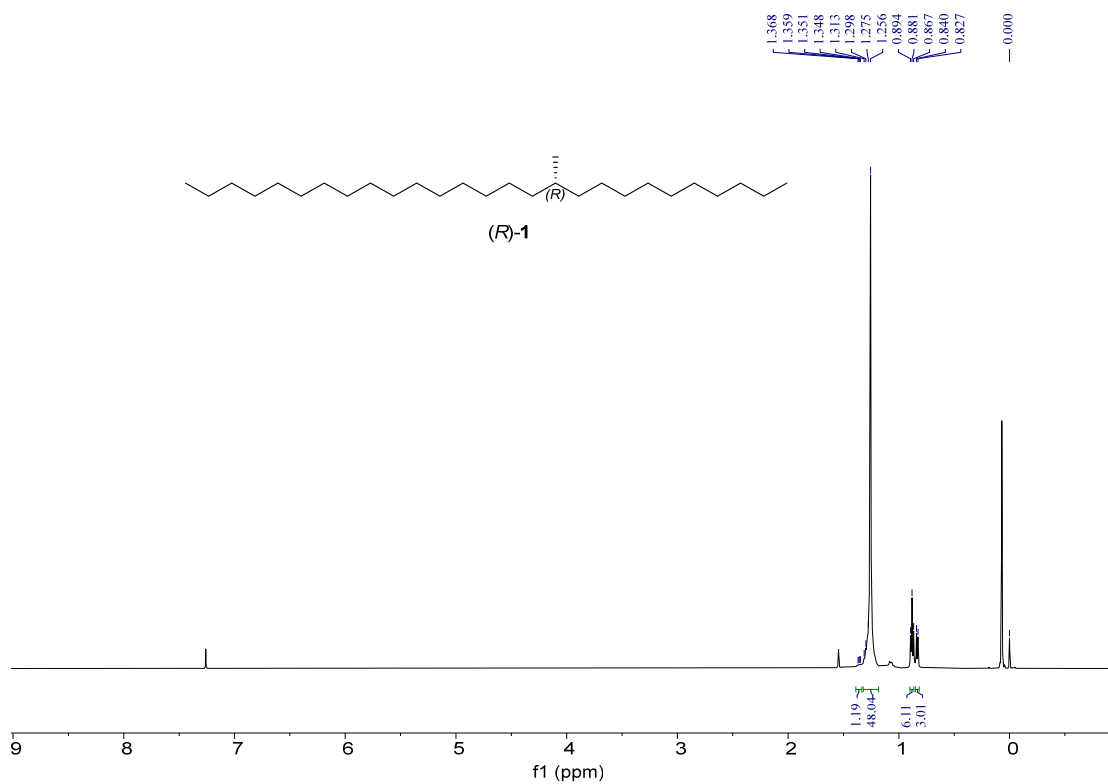

Figure S29. <sup>1</sup>H NMR Spectrum of (R)-11-methylheptacosane ((R)-1) (500 MHz, CDCl<sub>3</sub>)

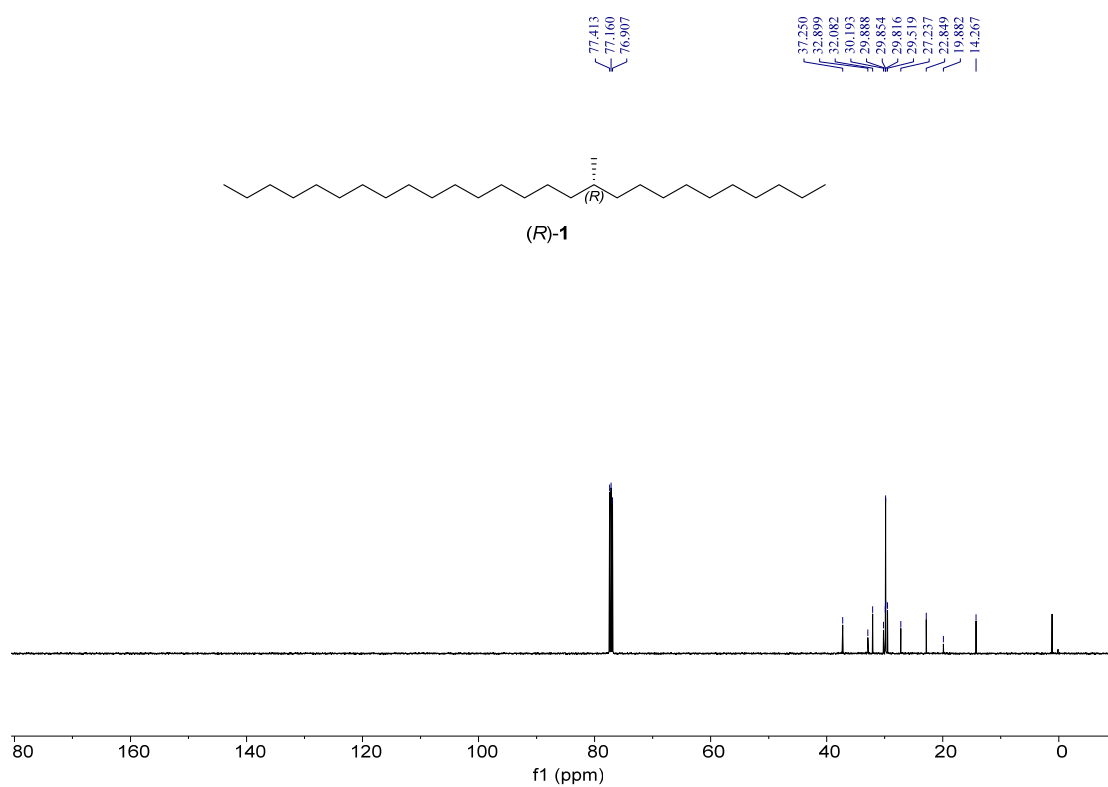

Figure S30. <sup>13</sup>C NMR Spectrum of (R)-11-methylheptacosane ((R)-1) (126 MHz, CDCl<sub>3</sub>)



## 2. HPLC Chromatography of the Compounds

**Figure S31.** HPLC Chromatography of racemic 2-((2-methyldodecyl)thio)benzo[d]thiazole (*rac*-8) (Daicel Chiralcel OD-H column; *n*-hexane/*i*-propanol = 99:1, 0.7 mL/min, 254 nm)

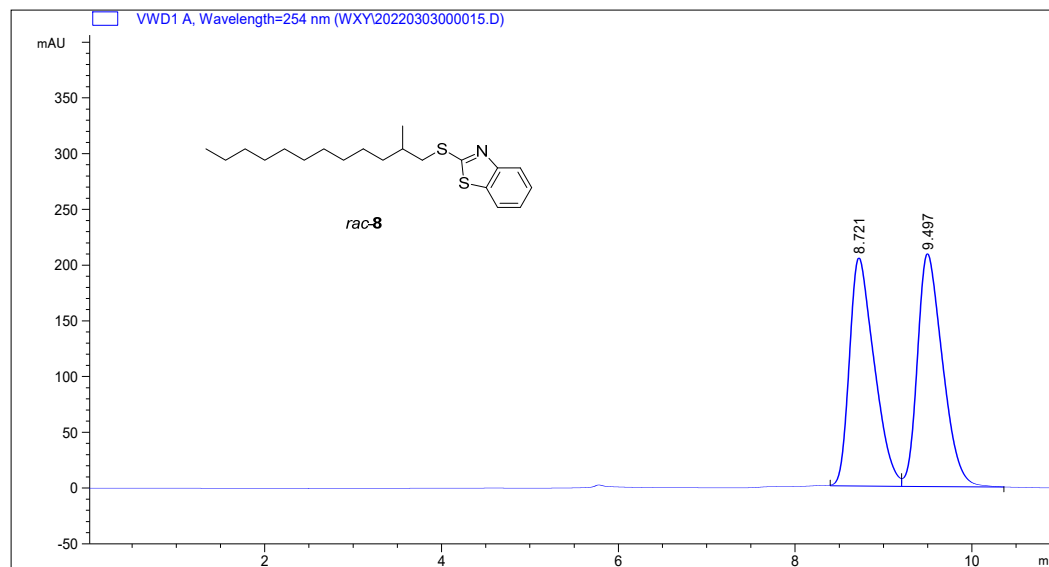

| Peak #  | RetTime [min] | Type | Width [min] | Area mAU*s | Height [mAU] | Area %  |
|---------|---------------|------|-------------|------------|--------------|---------|
| 1       | 8.721         | BV   | 0.2900      | 3992.59229 | 204.86427    | 49.1413 |
| 2       | 9.497         | VB   | 0.3005      | 4132.12256 | 209.07364    | 50.8587 |
| Totals: |               |      |             | 8124.71484 | 413.93791    |         |

**Figure S32.** HPLC Chromatography of (*S*)-2-((2-methyldodecyl)thio)benzo[d]thiazole ((*S*)-8) (Daicel Chiralcel OD-H column; *n*-hexane/*i*-propanol = 99:1, 0.7 mL/min, 254 nm)

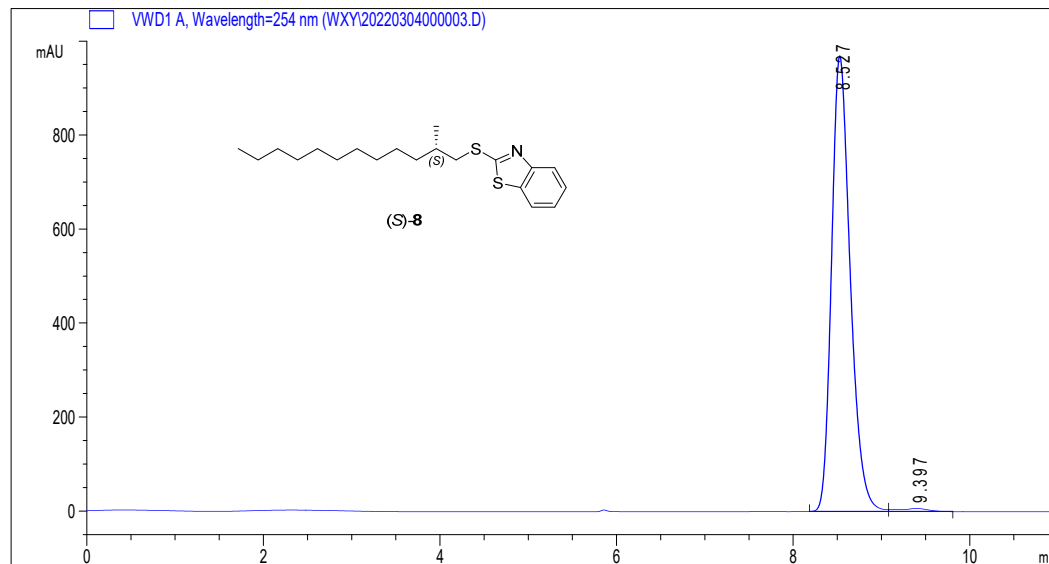

| Peak #  | RetTime [min] | Type | Width [min] | Area mAU*s | Height [mAU] | Area %  |
|---------|---------------|------|-------------|------------|--------------|---------|
| 1       | 8.527         | BV   | 0.2240      | 1.42628e4  | 969.64209    | 98.8850 |
| 2       | 9.397         | VB   | 0.3263      | 160.82082  | 6.88656      | 1.1150  |
| Totals: |               |      |             | 1.44236e4  | 976.52865    |         |

**Figure S33.** HPLC Chromatography of (*R*)-2-((2-methyldodecyl)thio)benzo[d]thiazole ((*R*)-**8**) (Daicel Chiralcel OD-H column; *n*-hexane/*i*-propanol = 99:1, 0.7 mL/min, 254 nm)

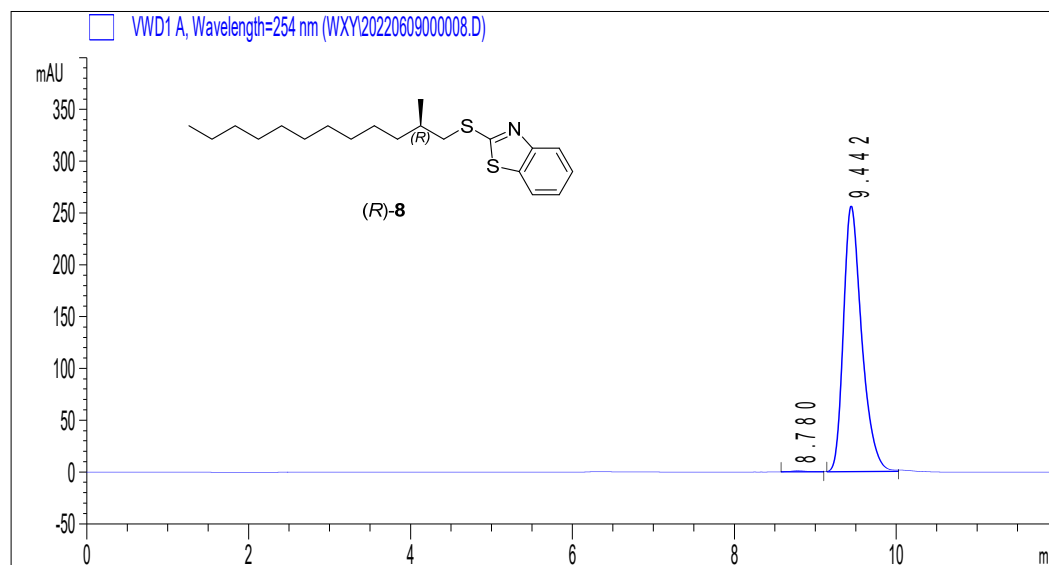

| Peak #  | RetTime [min] | Type | Width [min] | Area mAU*s | Height [mAU] | Area %  |
|---------|---------------|------|-------------|------------|--------------|---------|
| 1       | 8.780         | BB   | 0.2182      | 16.30239   | 1.11812      | 0.4028  |
| 2       | 9.442         | BB   | 0.2372      | 4031.32129 | 256.58481    | 99.5972 |
| Totals: |               |      |             | 4047.62368 | 257.70293    |         |
